# Supplementary material for: Management of non-compressible torso hemorrhage of the abdomen in civilian and military austere/remote environments: protocol for a scoping review
Source: HighWire-hosted journal article supplement (doi:10.1136/tsaco-2021-000811), 2021-10-01
Supplement: tsaco-2021-000811supp001_data_supplement.pdf [file tsaco-2021-000811supp001_data_supplement.pdf]

## **APPENDIX #1 STRING SEARCHES**

### Search Strategy for Scopus

#### 37 document results

( TITLE-ABS-KEY ( "incompressible truncal hemorrhage" OR "non-compressible truncal hemorrhage" OR acth OR "non-compressible torso hemorrhage" OR "incompressible torso hemorrhage" OR "torso hemorrhage" OR exsanguination OR "incompressible abdominal hemorrhage" OR "non-compressible abdominal hemorrhage" OR "intracavitary incompressible hemorrhage" OR "intracavity non-compressible hemorrhage" ) AND TITLE-ABS-KEY ( rural OR austere OR remote OR prehospital OR "golden hour" OR "prolonged field care" OR "forward surgical care" ) AND TITLE-ABS-KEY ( abdomen OR abdominal ) )

### Search Strategy for PubMed

#### 84 document results

("noncompressible truncal hemorrhage" OR "non-compressible truncal hemorrhage" OR ncth OR "non-compressible torso hemorrhage" OR "noncompressible torso hemorrhage" OR "torso hemorrhage" OR exsanguination OR "noncompressible abdominal hemorrhage" OR "non-compressible abdominal hemorrhage" OR "intracavitary noncompressible hemorrhage" OR "intracavity non-compressible hemorrhage") AND(rural OR austere OR remote OR prehospital OR "golden hour" OR "prolonged field care" OR "forward surgical care" OR "Rural Population"[Mesh] OR "Rural Health Services"[Mesh] OR "Rural Health"[Mesh] OR "Hospitals, Rural"[Mesh] OR "Emergency Medical Services"[Mesh]) AND (abdomen OR abdominal OR "Abdomen"[Mesh] OR "Abdominal Injuries"[Mesh])

### Search Strategy for Cochrane Central Register of Controlled Trials

#### 3 Trials matching

"noncompressible truncal hemorrhage" OR "non-compressible truncal hemorrhage" OR ncth OR "non-compressible torso hemorrhage" OR "noncompressible torso hemorrhage" OR "torso hemorrhage" OR exsanguination OR "noncompressible abdominal hemorrhage" OR "non-compressible abdominal hemorrhage" OR "intracavitary noncompressible hemorrhage" OR "intracavity non-compressible hemorrhage" in Title Abstract Keyword AND rural OR austere OR remote OR prehospital OR "golden hour" OR "prolonged field care" OR "forward surgical care" in Title Abstract Keyword AND abdomen OR abdominal in Title Abstract Keyword - (Word variations have been searched)
