# Supplementary material for: Management of non-compressible torso hemorrhage of the abdomen in civilian and military austere/remote environments: protocol for a scoping review
Source: HighWire-hosted journal article supplement (doi:10.1136/tsaco-2021-000811), 2021-10-01
Supplement: tsaco-2021-000811supp002_data_supplement.pdf [file tsaco-2021-000811supp002_data_supplement.pdf]

**APPENDIX #2 DATA CHARTING**

**Presentation of Results:**

| Table 1 Draft of Charting Form |                  |                    |         |                             |            |     |          |          |             |               |               |                                                        |                                                              |                                                 |                                 |  |
|--------------------------------|------------------|--------------------|---------|-----------------------------|------------|-----|----------|----------|-------------|---------------|---------------|--------------------------------------------------------|--------------------------------------------------------------|-------------------------------------------------|---------------------------------|--|
| Study Characteristics          | Publication year | Research Time Span | Country | Purpose/Aim of the Research | Population |     | Setting  |          | Sample Size | Type of Study | Main Outcomes | How the study outcome addresses the research Question? | Context of civilian and military austere/remote environments | Management of non-compressible torso hemorrhage | Healthcare disciplines involved |  |
|                                |                  |                    |         |                             | Age        | Sex | Civilian | Military |             |               |               |                                                        |                                                              |                                                 |                                 |  |
| Citations                      |                  |                    |         |                             |            |     |          |          |             |               |               |                                                        |                                                              |                                                 |                                 |  |
|                                |                  |                    |         |                             |            |     |          |          |             |               |               |                                                        |                                                              |                                                 |                                 |  |
|                                |                  |                    |         |                             |            |     |          |          |             |               |               |                                                        |                                                              |                                                 |                                 |  |
|                                |                  |                    |         |                             |            |     |          |          |             |               |               |                                                        |                                                              |                                                 |                                 |  |
